# Supplementary material
Source: PubMed Central journal article supplement (PMC3684628)

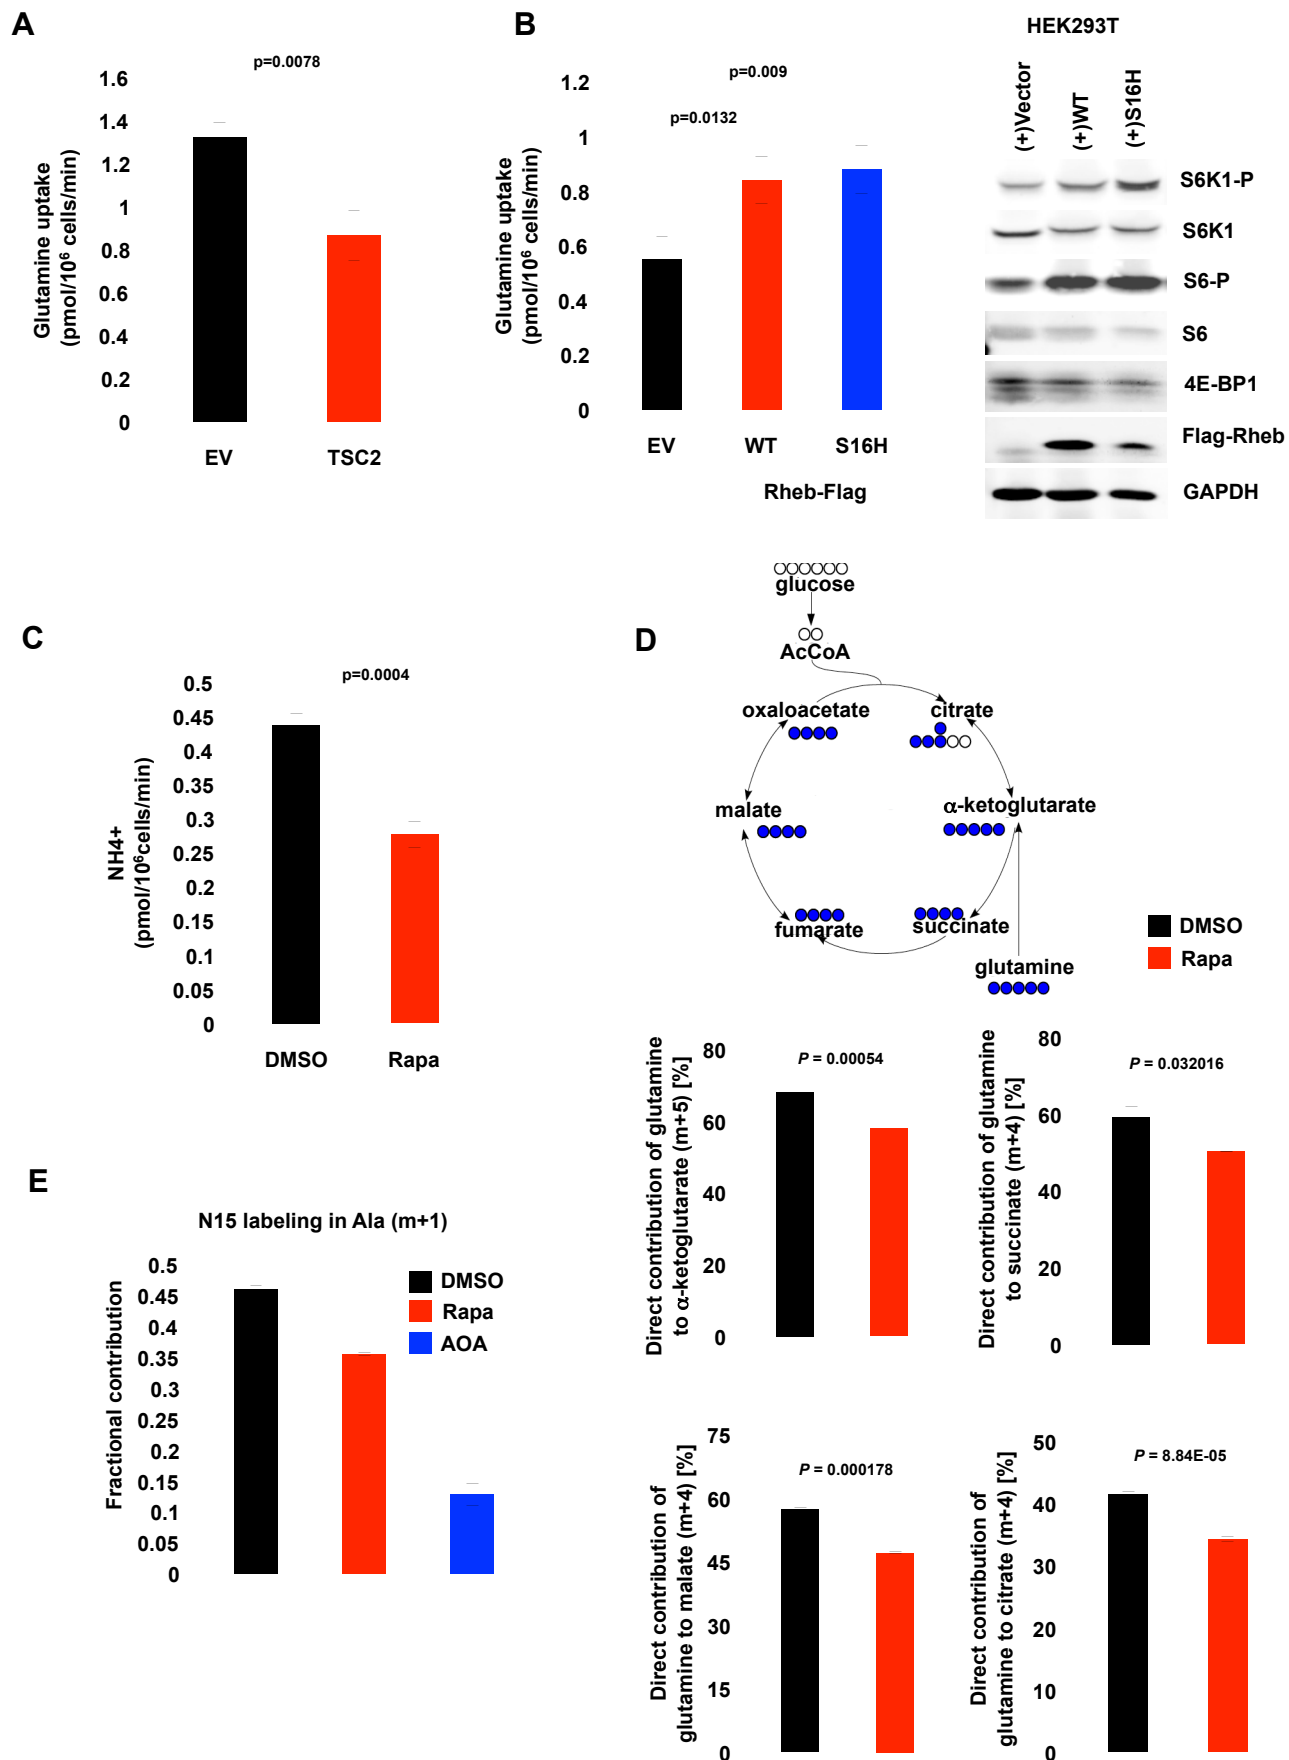

**A**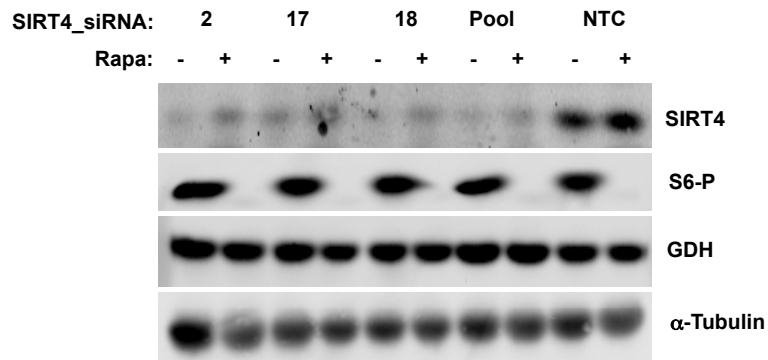**B**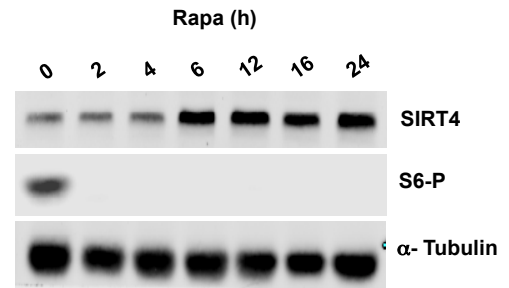**C**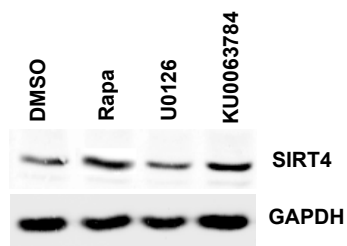**D**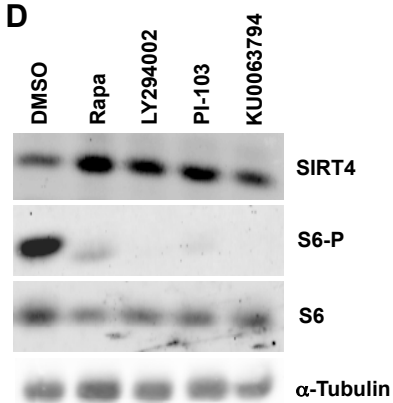**E**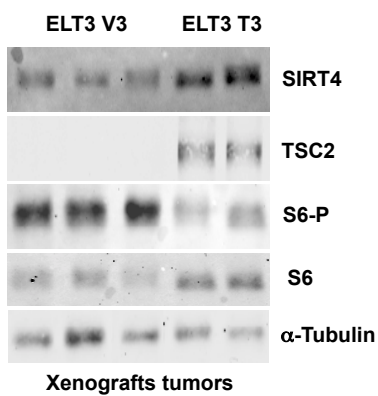**F**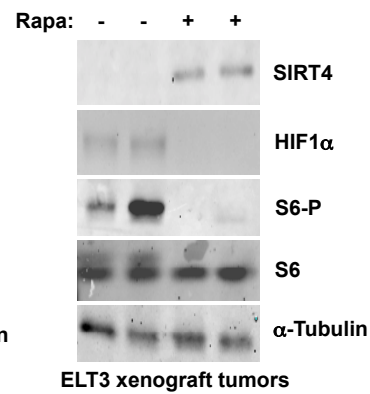

A

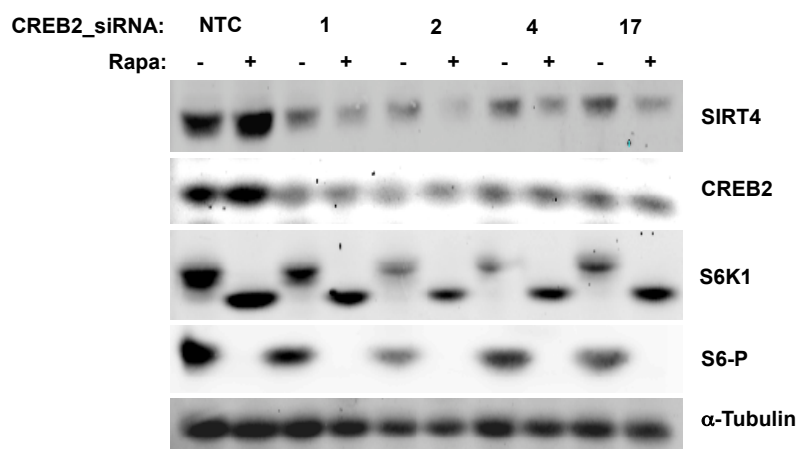

B

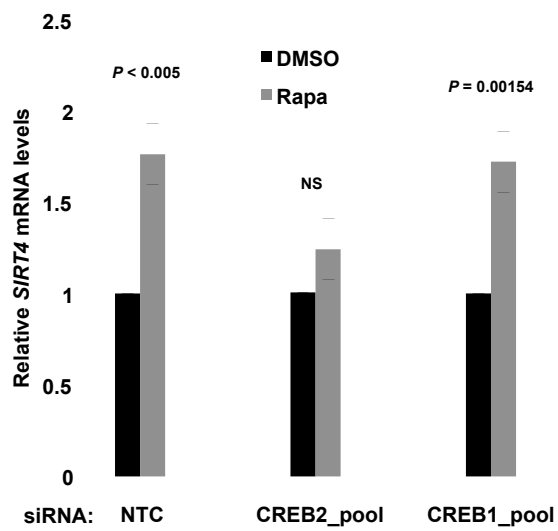

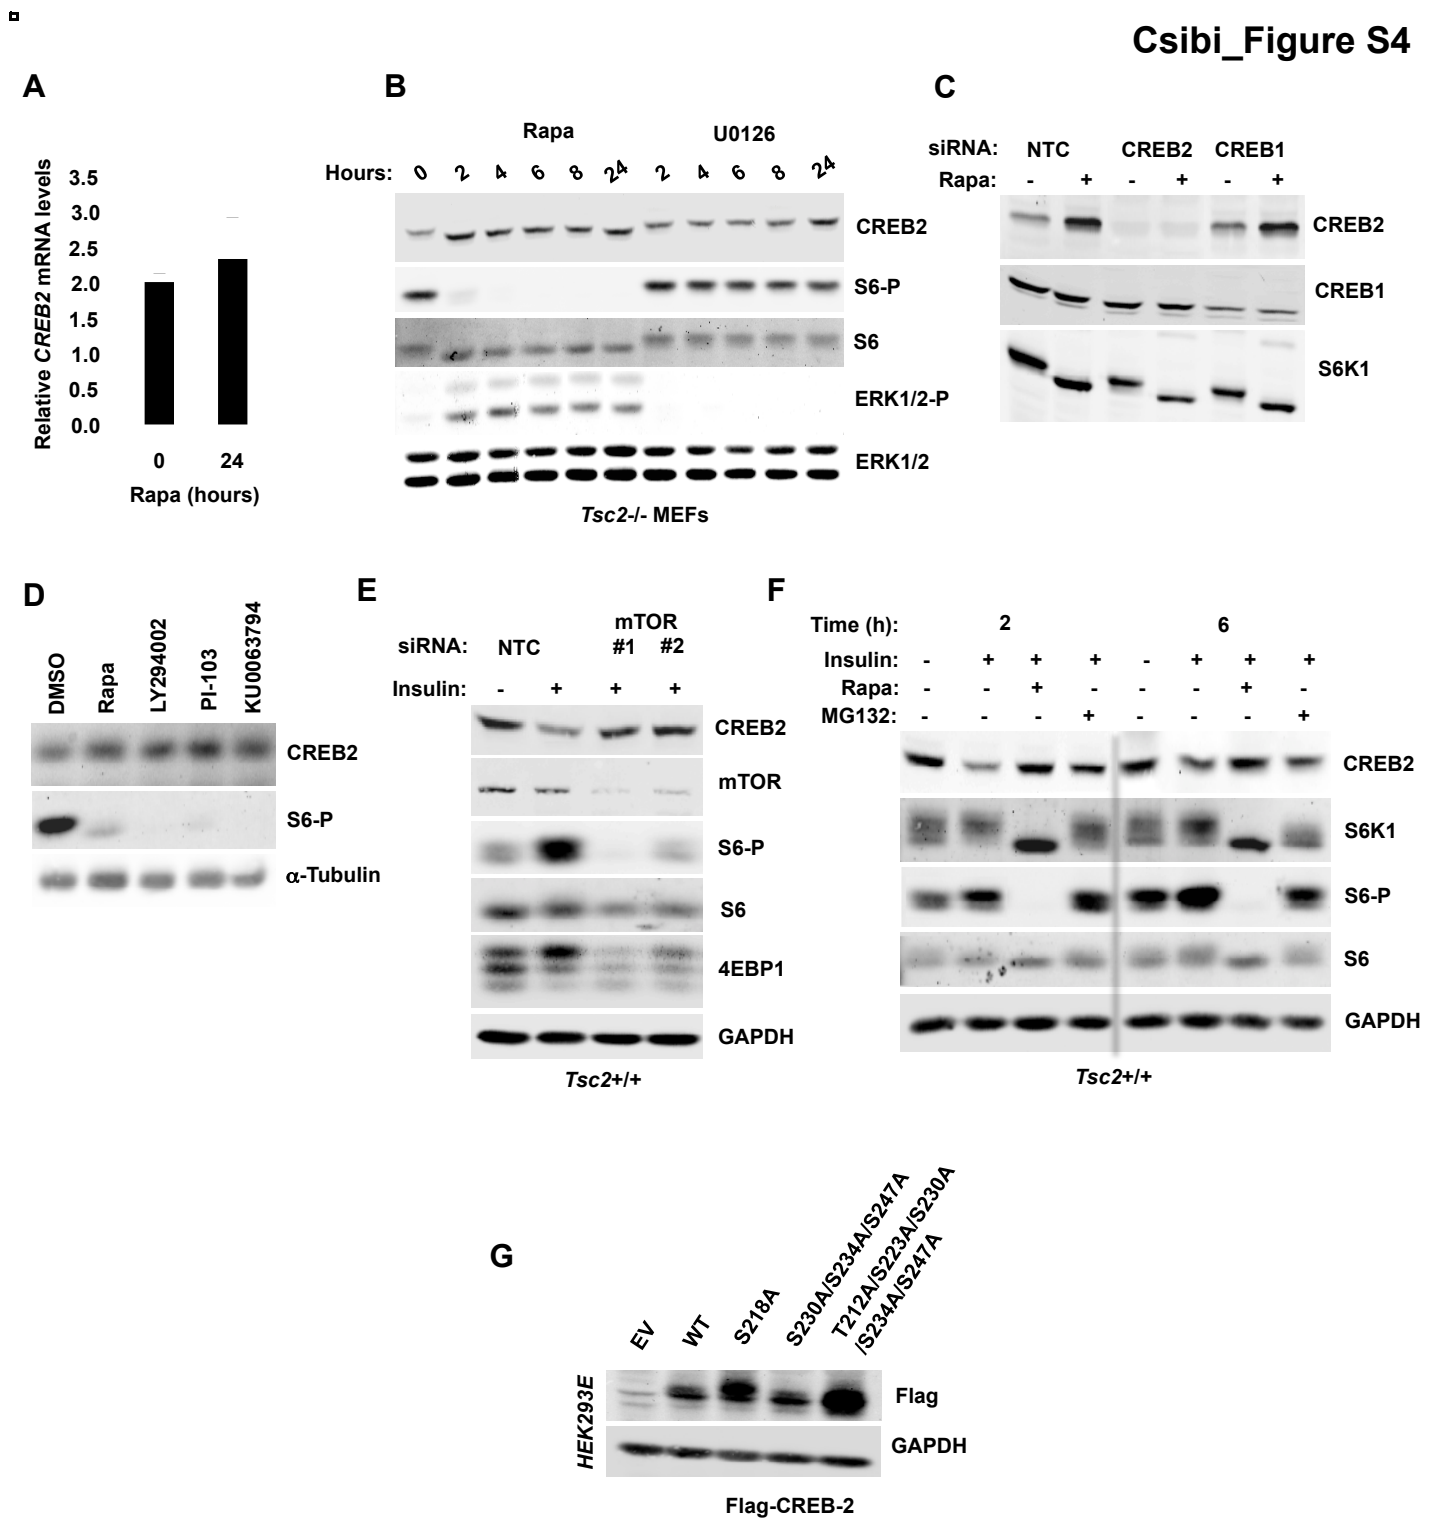

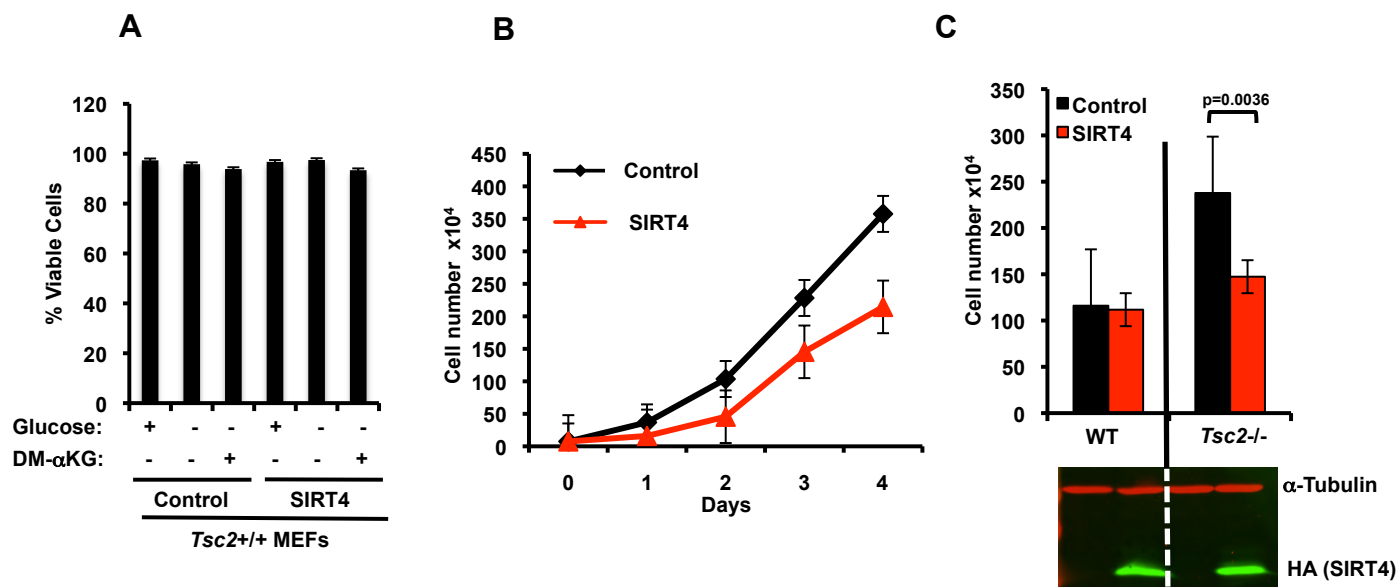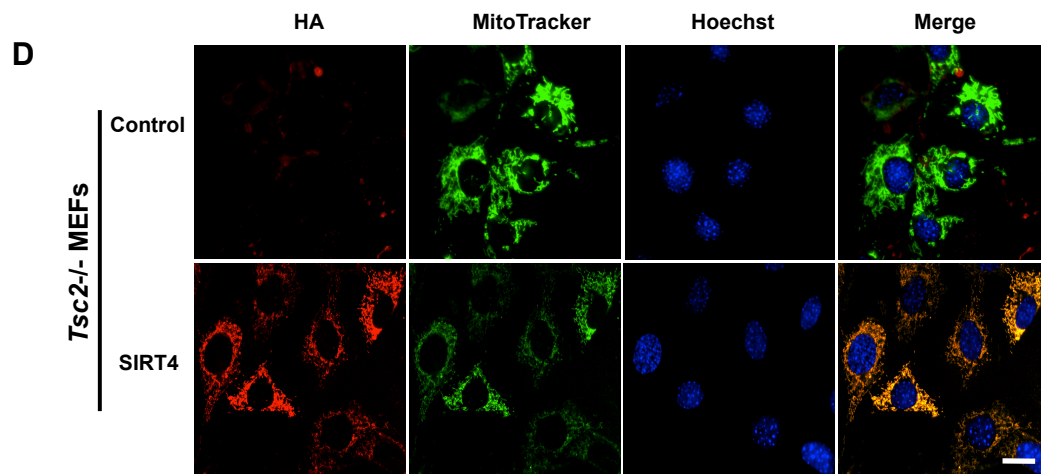



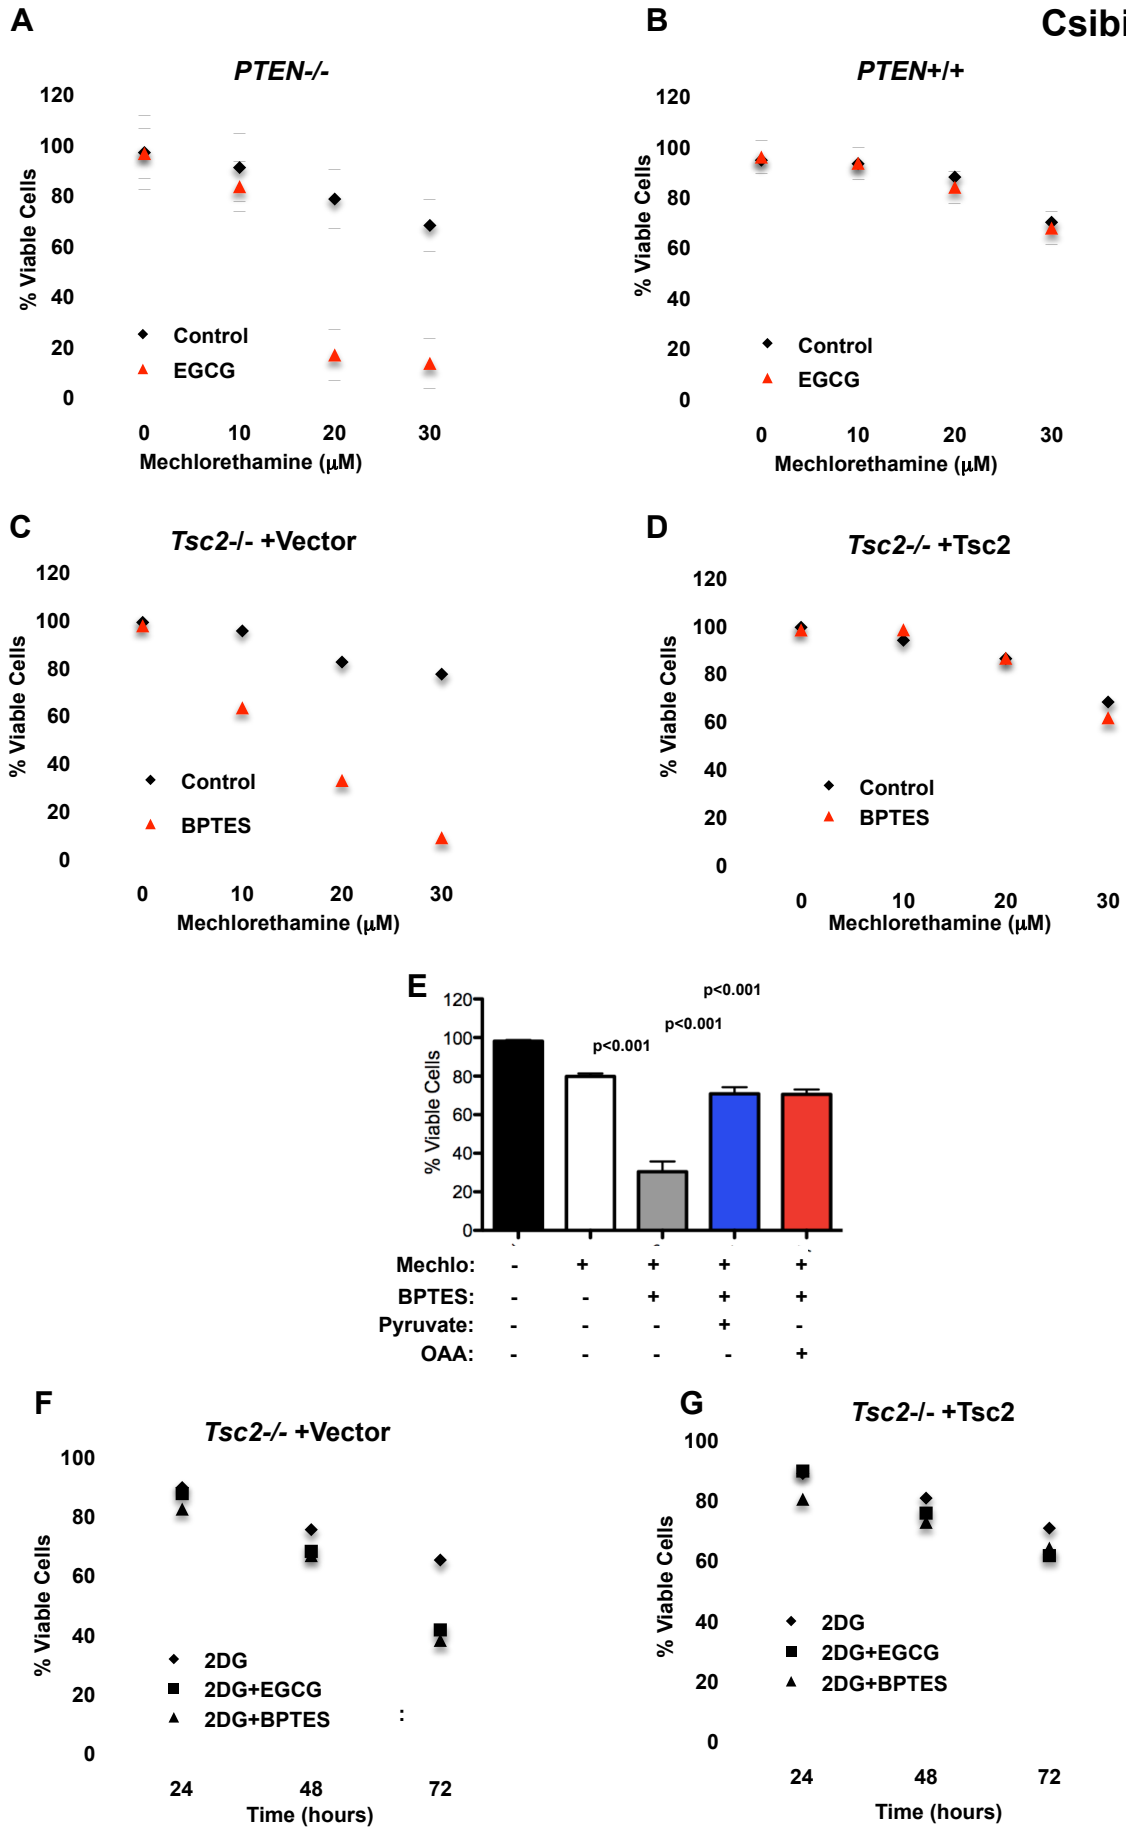

Supplement: NIHMS474527-supplement-02.pdf [file NIHMS474527-supplement-02.pdf]
